# Supplementary material for: Na2Ti3O7: an intercalation based anode for sodium-ion battery applications
Source: Royal Society of Chemistry journal article supplement (doi:10.1039/c2ta01057g), 2012-12-11
Supplement: c2ta01057g.pdf [file c2ta01057g.pdf]

## Supplementary Information

### **Na<sub>2</sub>Ti<sub>3</sub>O<sub>7</sub>: An intercalation based anode for sodium-ion battery application**

**Ashish Rudola,<sup>a</sup> Kuppan Saravanan,<sup>a</sup> Chad Mason<sup>a</sup> and Palani Balaya<sup>a,b,\*</sup>**

*<sup>a</sup>Department of Mechanical Engineering, NUS, Singapore 117576*

*<sup>b</sup>Engineering Science Department, NUS, Singapore 117576*

*E-mail: [mpepb@nus.edu.sg](mailto:mpepb@nus.edu.sg)*

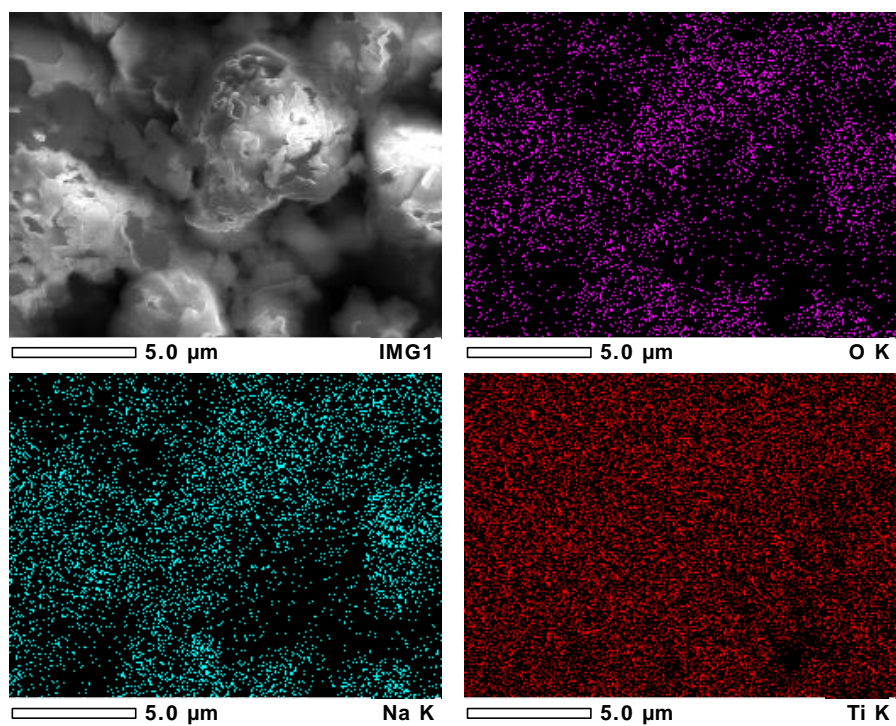

Fig. S1 SEM examination along with elemental mapping for the elements Na, Ti and O for the as-synthesized  $\text{Na}_2\text{Ti}_3\text{O}_7$ . No other impurity elements were detected. The mapped cyan, red and pink regions correspond to Na, Ti and O, respectively. The elemental mapping demonstrates a uniform distribution of elements throughout the volume of the sample analyzed.

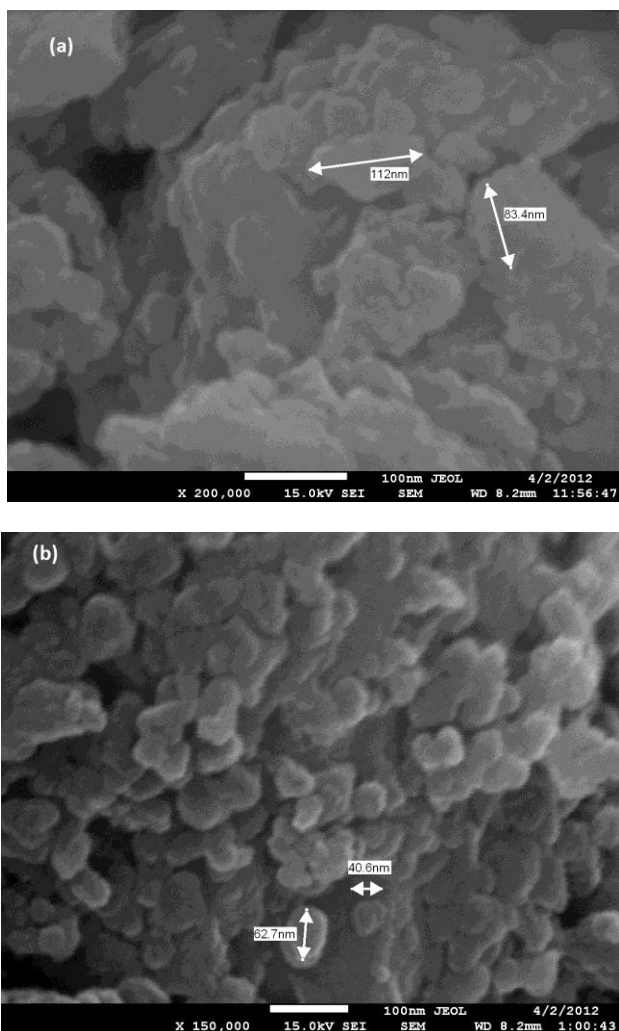

Fig. S2 FESEM image taken of: Top- (a) Pure  $\text{Na}_2\text{Ti}_3\text{O}_7$  ball milled at 400 rpm for 20 minutes at a  $\times 200,000$  magnification and Bottom- (b) ball-milled  $\text{Na}_2\text{Ti}_3\text{O}_7$  with CB at 400 rpm for 20 minutes at a  $\times 150,000$  magnification.

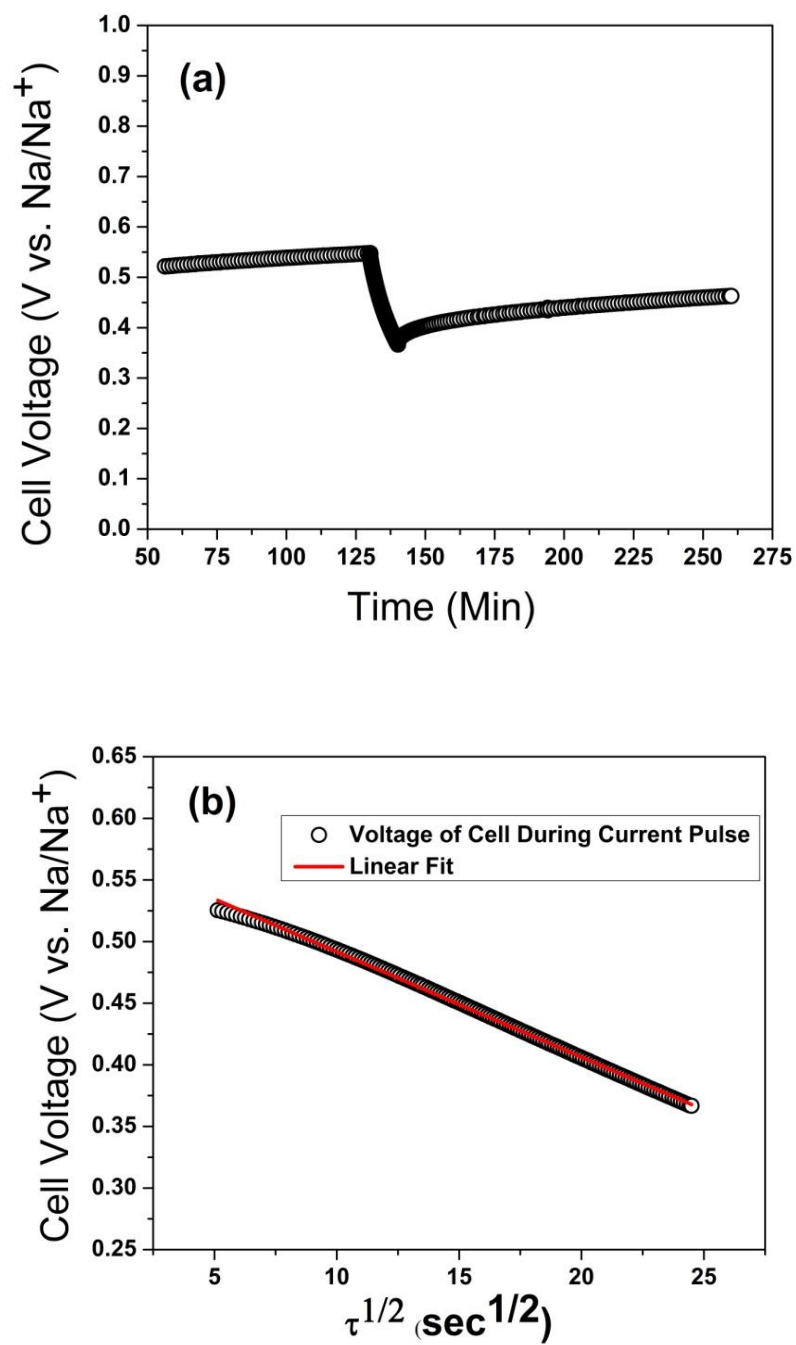

Fig. S3 A representative pulse used for GITT calculations showing (a) one pulse during the initial stages of discharge along with the subsequent relaxation step, and the previous step's relaxation step, and (b) the linear relationship between  $E_{\tau}$  with  $\tau^{1/2}$  which is needed for utilizing the GITT relation.
